# Supplementary material for: TEFM regulates both transcription elongation and RNA processing in mitochondria
Source: PubMed Central journal article supplement — EMBO Rep. 2019 Apr 29;20(6):e48101. doi: 10.15252/embr.201948101 (PMC6549021; doi:10.15252/embr.201948101), 2019-04-29
Supplement: EMBR-20-e48101-s002.pdf [file EMBR-20-e48101-s002.pdf]

## Expanded View Figures

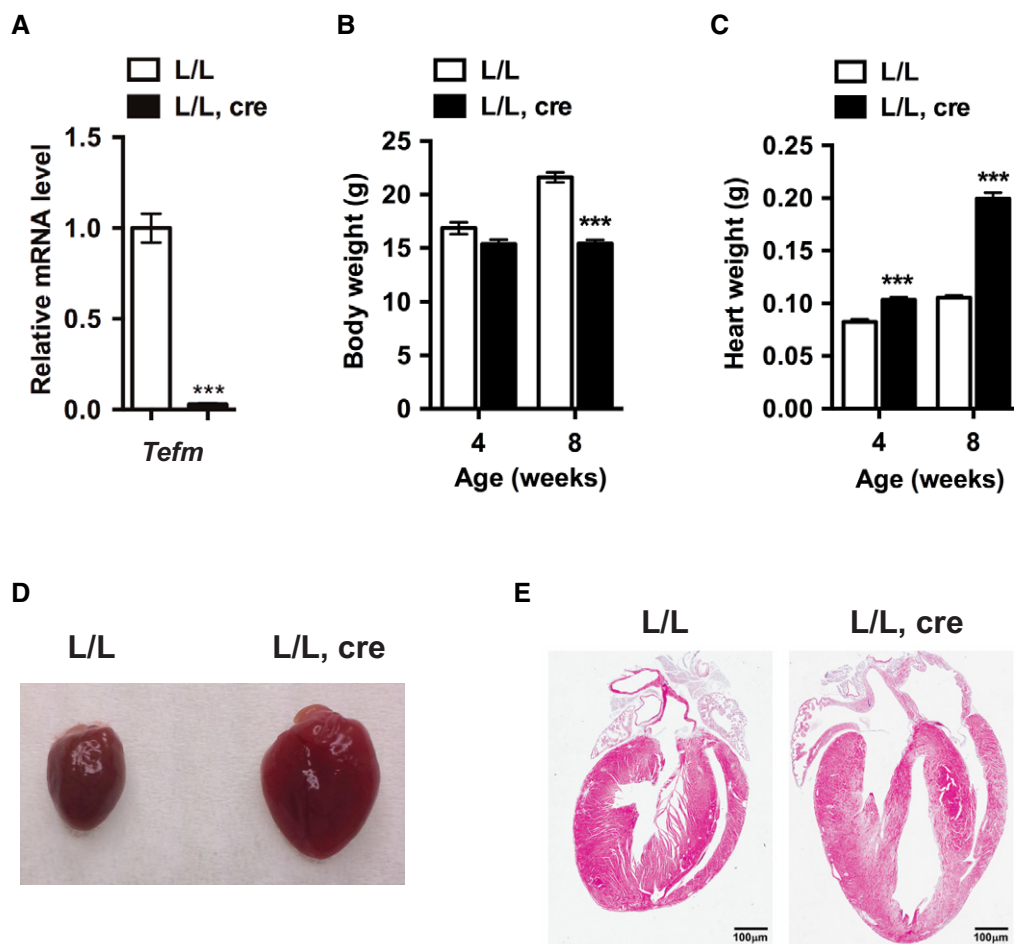

**Figure EV1. Disruption of *Tefm* in the germline and heart.**

A RT-qPCR analyses of the RNA level of *Tefm* in 8-week-old control (L/L) and *Tefm* knockout (L/L, cre) mice ( $n = 10$  mice for each group).

B Body weight of 4- and 8-week-old control and *Tefm* knockout mice. At 4 weeks: L/L  $n = 22$ , L/L, cre  $n = 15$ ; 8 weeks: L/L  $n = 41$ , L/L, cre  $n = 39$ .

C Heart weight of 4- and 8-week-old control and *Tefm* knockout mice. At 4 weeks: L/L  $n = 22$ , L/L, cre  $n = 15$ ; 8 weeks: L/L  $n = 41$ , L/L, cre  $n = 39$ .

D Representative images of hearts of 8-week-old control and *Tefm* knockout mice ( $n = 5$  mice for each group).

E Representative images of hematoxylin and eosin staining showing heart structure and morphology in 8-week-old control and *Tefm* knockout mice ( $n = 5$  mice for each group). Scale bar, 100  $\mu\text{m}$ .

Data information: In (A–C), data are presented as mean  $\pm$  SEM. \*\*\* $P < 0.001$ ; Student's  $t$ -test. (A)  $P = 3.666241\text{e-}010$ ; (B) 4 weeks  $P = 0.0541737$ , 8 weeks  $P = 1.126271\text{e-}016$ ; (C) 4 weeks  $P = 1.207998\text{e-}006$ , 8 weeks  $P = 1.305101\text{e-}026$ .

**Figure EV2. Depletion of TEFM in heart causes mitochondrial dysfunction.**

- A Quantification of the relative mitochondrial mass by electron microscopy analysis of the heart of 8-week-old control and *Tefm* knockout mice ( $n = 5$  mice for each group).
- B Quantitative PCR analyses of the relative mtDNA levels in 4- and 8-week-old control and *Tefm* knockout mice ( $n = 8$  mice at each time-point for each group).
- C, D Oxygen consumption rates measured using an Oroboros oxygen electrode in heart mitochondria isolated from 8-week-old control and *Tefm* knockout mice ( $n = 5$  mice for each group). Phosphorylating, non-phosphorylating, and uncoupled respiration under carbonyl cyanide 3-chlorophenylhydrazone states were measured using pyruvate, glutamate, and malate or succinate and rotenone as substrates.
- E Western blot analyses of subunits of OXPHOS at the age of 8 weeks ( $n = 15$  mice for each group). Nucleus-encoded subunits of complex I (NDUFB8), complex II (SDHB), complex III (UQCRC2), complex IV (MTCOX1), and complex V (ATP5A) were analyzed. VDAC was used as loading control.
- F Analysis of the assembly of the OXPHOS complexes by BN-PAGE in heart mitochondria of 8-week-old control *Tefm* knockout mice ( $n = 6$  mice for each group). OXPHOS complexes were detected by western blot following the BN-PAGE, including complex I (NDUFB2), complex II (SDHA), complex III (UQCRC1), complex IV (COXIV), and complex V (ATP5A).

Data information: In (A–D), data are presented as mean  $\pm$  SEM. \* $P < 0.05$ , \*\* $P < 0.01$ , \*\*\* $P < 0.001$ ; Student's *t*-test. A:  $P = 0.0003$ ; B: 4 weeks: *Nd1/18S*  $P = 0.0135973$ , *Nd6/18S*  $P = 0.00955924$ , *Cyb/18S*  $P = 0.0114725$ , 8 weeks: *Nd1/18S*  $P = 1.449815e-005$ , *Nd6/18S*  $P = 6.995544e-005$ , *Cyb/18S*  $P = 4.002903e-006$ . C:  $P =$  Complex I Phosphorylating  $P = 1.355075e-008$ , Non-phosphorylating  $P = 0.00279867$ , Uncoupled  $P = 0.000431079$ ; D: Complex II Phosphorylating  $P = 1.399847e-007$ , Non-phosphorylating  $P = 4.396380e-008$ , Uncoupled  $P = 1.662621e-006$ .

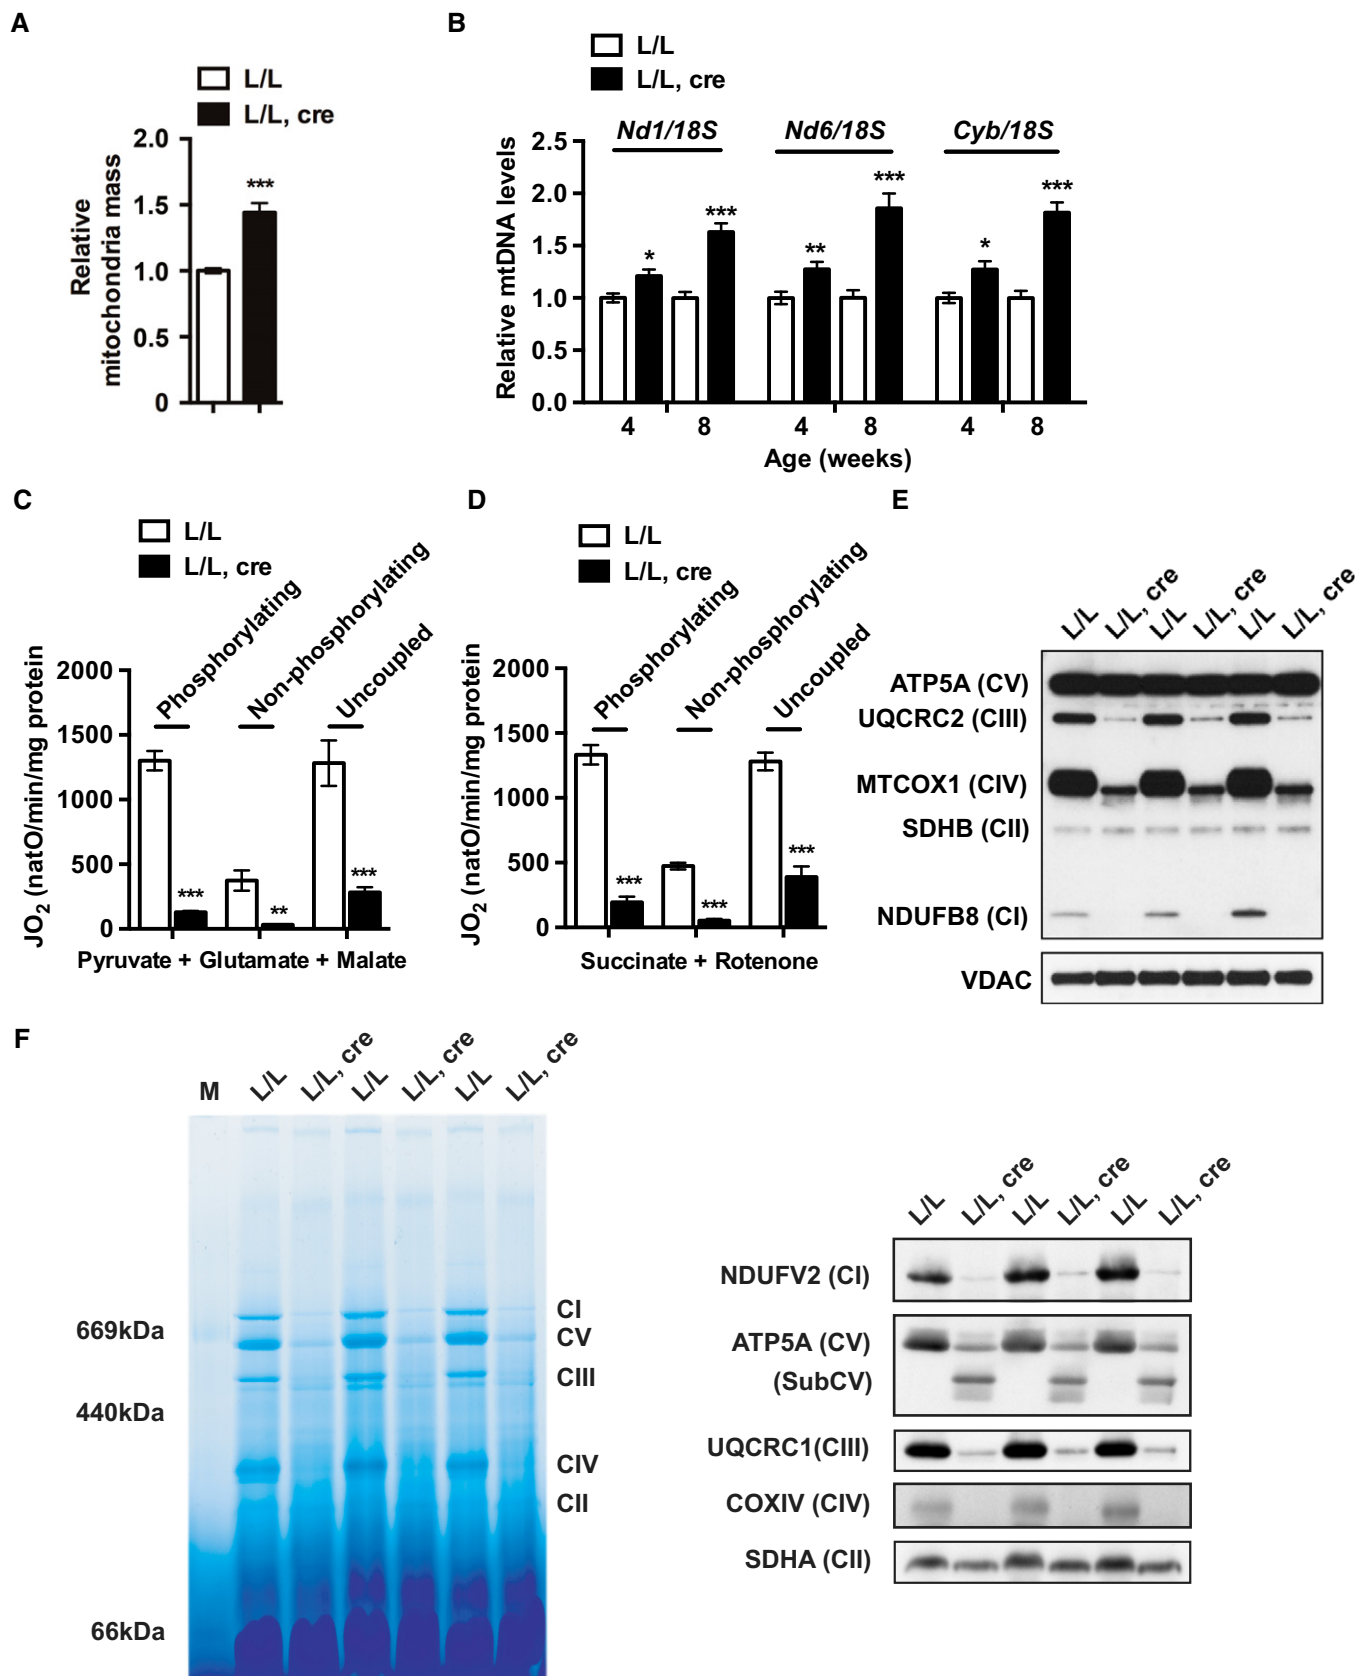

Figure EV2.

**Figure EV3. Proteome of *Tefm* knockout heart mitochondria.**

- A Beeswarm plot presenting the distribution of differentially expressed proteins (Benjamini–Hochberg adj.  $P < 0.05$ ) in mitochondrial pathways after knockout of *Tefm* at 8 weeks of age ( $n = 5$  mice for each group).
- B Heatmap showing differentially expressed respiratory chain complexes assembly factors (upper panel) and RNA metabolism-related proteins (lower panel) in *Tefm* knockout mice in comparison to controls [L/L, cre/L/L].
- C Volcano scatterplots depicting the expression levels of the subunits of the small (28S) and large (39S) ribosomes in green and blue, respectively. Red dotted line, Benjamini–Hochberg adj.  $P = 0.05$ .

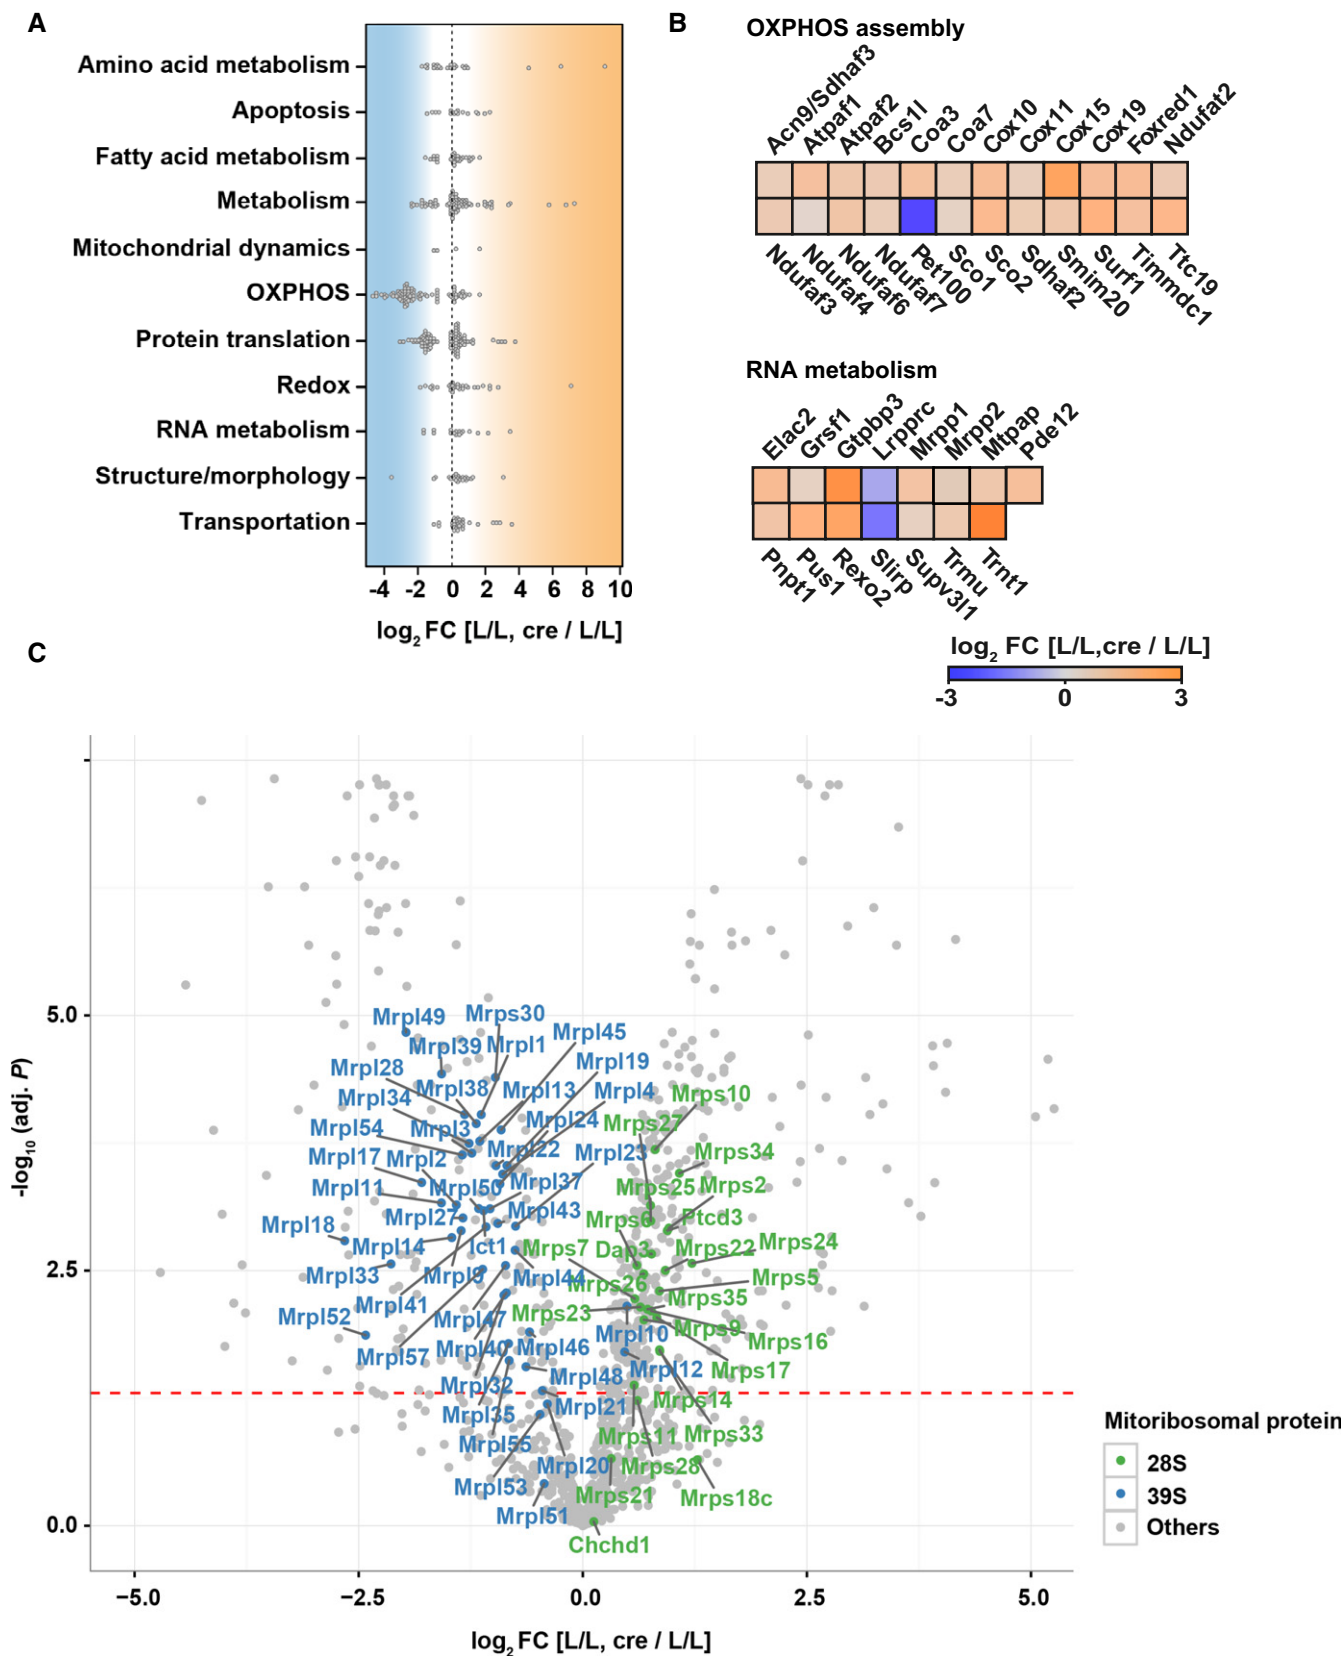

Figure EV3.

**Figure EV4. Characterization of whole-body *Tefm* and *Polrmt* double-heterozygous knockout mice and the effects of TEFM depletion on mitochondrial transcripts and the mtDNA replication machinery.**

- A Western blot analyses of POLRMT and TEFM protein levels in heart mitochondrial extracts from 16-week-old *Tefm* and *Polrmt* double-heterozygous knockout mice ( $n = 6$  mice for each group). VDAC was used as loading control.
- B Quantitative PCR analyses of the relative mtDNA levels in 16-week-old *Tefm* and *Polrmt* double-heterozygous knockout mice ( $n = 6$  mice for each group). *18S* was used to normalize for nuclear input.
- C Western blot analyses of subunits from individual OXPHOS complexes at the age of 16 weeks ( $n = 6$  mice for each group). Nucleus-encoded subunits of complex I (NDUFB8), complex II (SDHB), complex III (UQCRC2), complex IV (MTCOX1), and complex V (ATP5A) were analyzed. VDAC was used as loading control.
- D Northern blot analyses of mitochondrial transcripts of mt-rRNAs and mt-mRNAs in 16-week-old *Tefm* and *Polrmt* double-heterozygous knockout mouse hearts ( $n = 8$  mice for each group). *18S rRNA* was used as loading control.
- E Northern blot analyses of mitochondrial mt-tRNA transcripts in 16-week-old *Tefm* and *Polrmt* double-heterozygous knockout mouse hearts ( $n = 8$  mice for each group). *5.8S rRNA* was used as loading control.
- F RT-qPCR analyses of the mitochondrial transcripts in 8-week-old control and *Tefm* knockout mice ( $n = 12$  mice for each group).
- G Western blot analyses of TFAM and TFB2M in the 8-week-old control and *Tefm* knockout mice ( $n = 12$  mice for each group). SDHA was used as loading control.
- H Western blot analyses of the subunit A of the DNA polymerase  $\gamma$  (POL $\gamma$ A), DNA helicase TWINKLE, and ssDNA-binding protein (SSBP1) in 8-week-old control and *Tefm* knockout mice ( $n = 12$  mice for each group). VDAC was used as loading control.

Data information: In (B), data are presented as mean  $\pm$  SEM. Statistical analysis was performed using one-way analysis of variance (ANOVA). There is no difference between groups. In (F), data are presented as mean  $\pm$  SEM. \*\*\* $P < 0.001$ ; Student's  $t$ -test. (F) HSP transcripts: *12S rRNA*  $P = 0.000728399$ ; *16S rRNA*  $P = 1.10763E-06$ ; *Nd1*  $P = 2.63285E-06$ ; *Nd2*  $P = 0.00152084$ ; *Cox1*  $P = 1.29269E-06$ ; *Cox2*  $P = 1.9267E-05$ ; *Atp8*  $P = 3.05955E-07$ ; *Atp6*  $P = 0.000849436$ ; *Cox3*  $P = 4.98506E-05$ ; *Nd3*  $P = 4.07442E-05$ ; *Nd4*  $P = 1.43029E-06$ ; *Nd5*  $P = 6.04136E-05$ ; *Cyb*  $P = 0.00882284$ ; LSP transcript: *Nd6*  $P = 0.00139773$ .

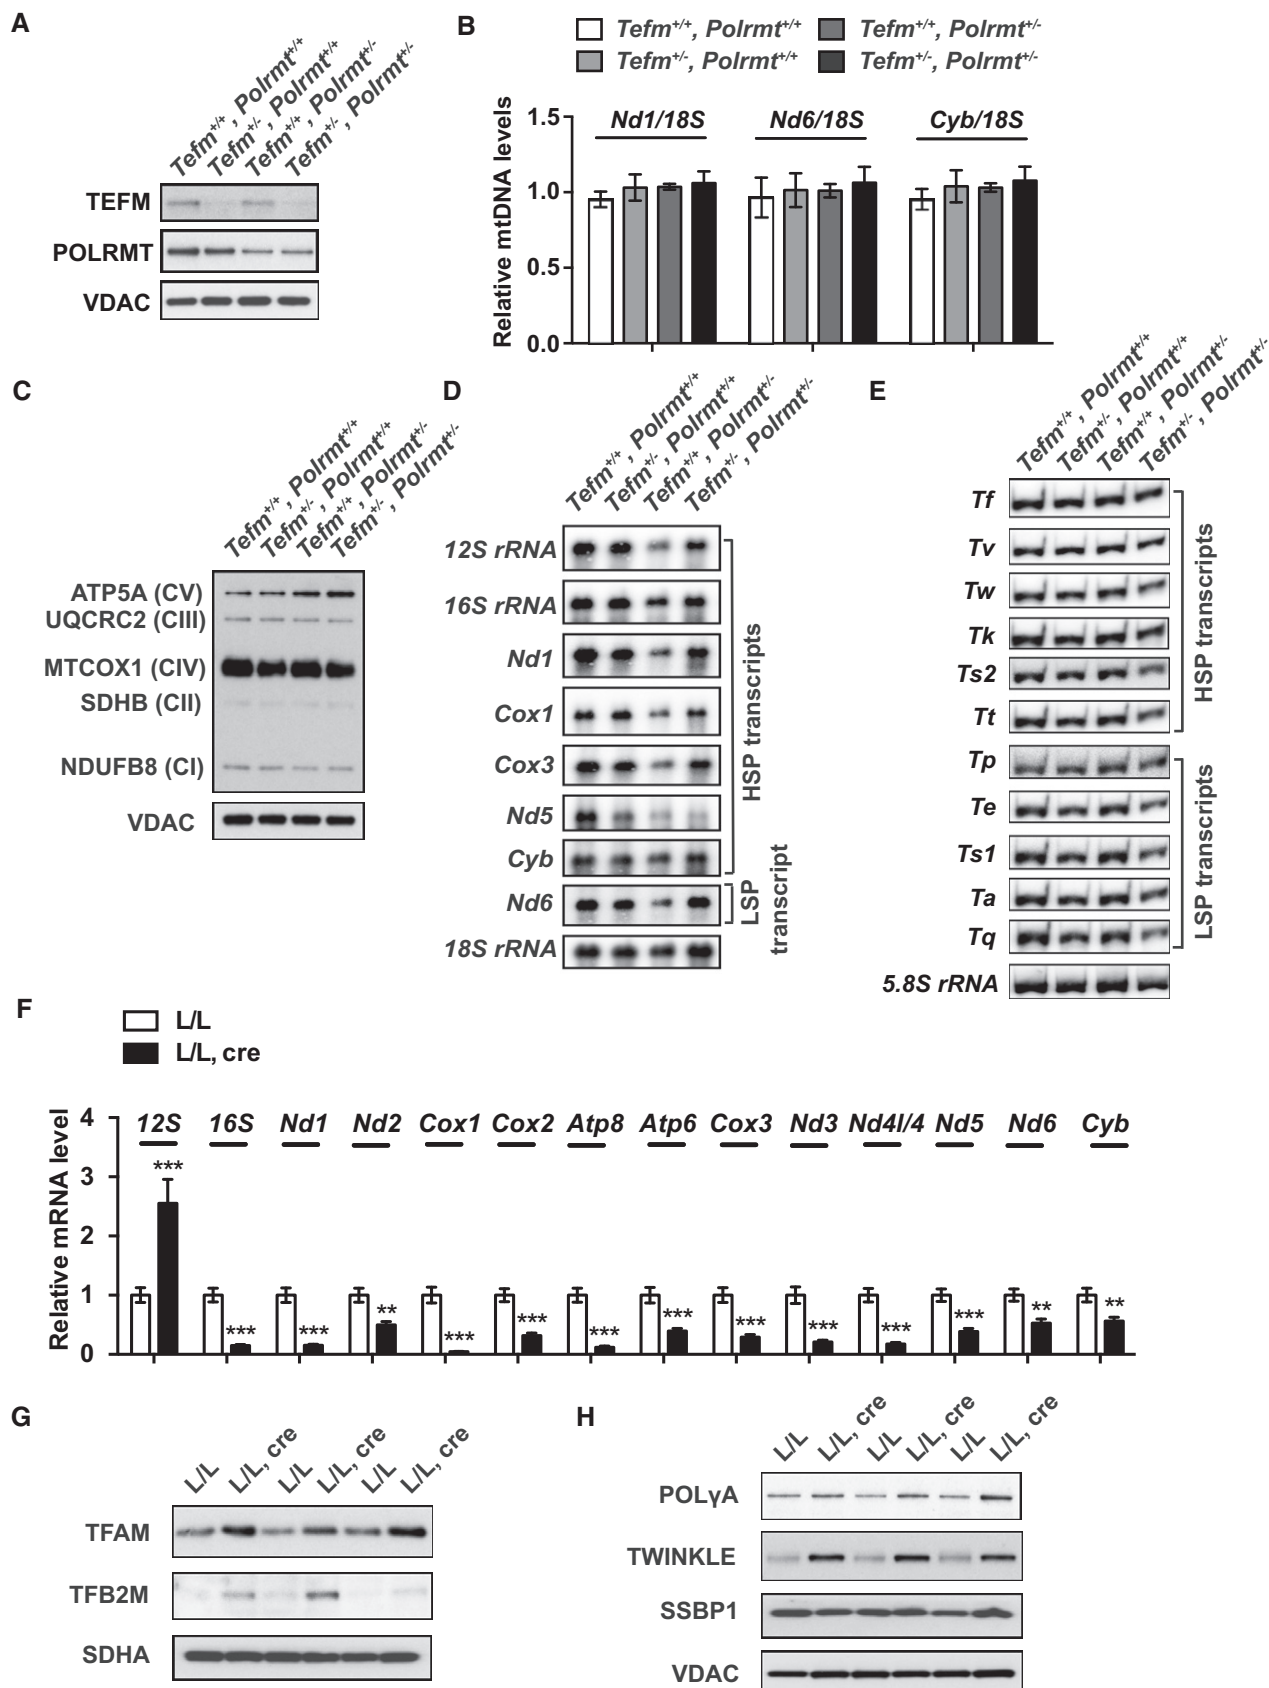

Figure EV4.

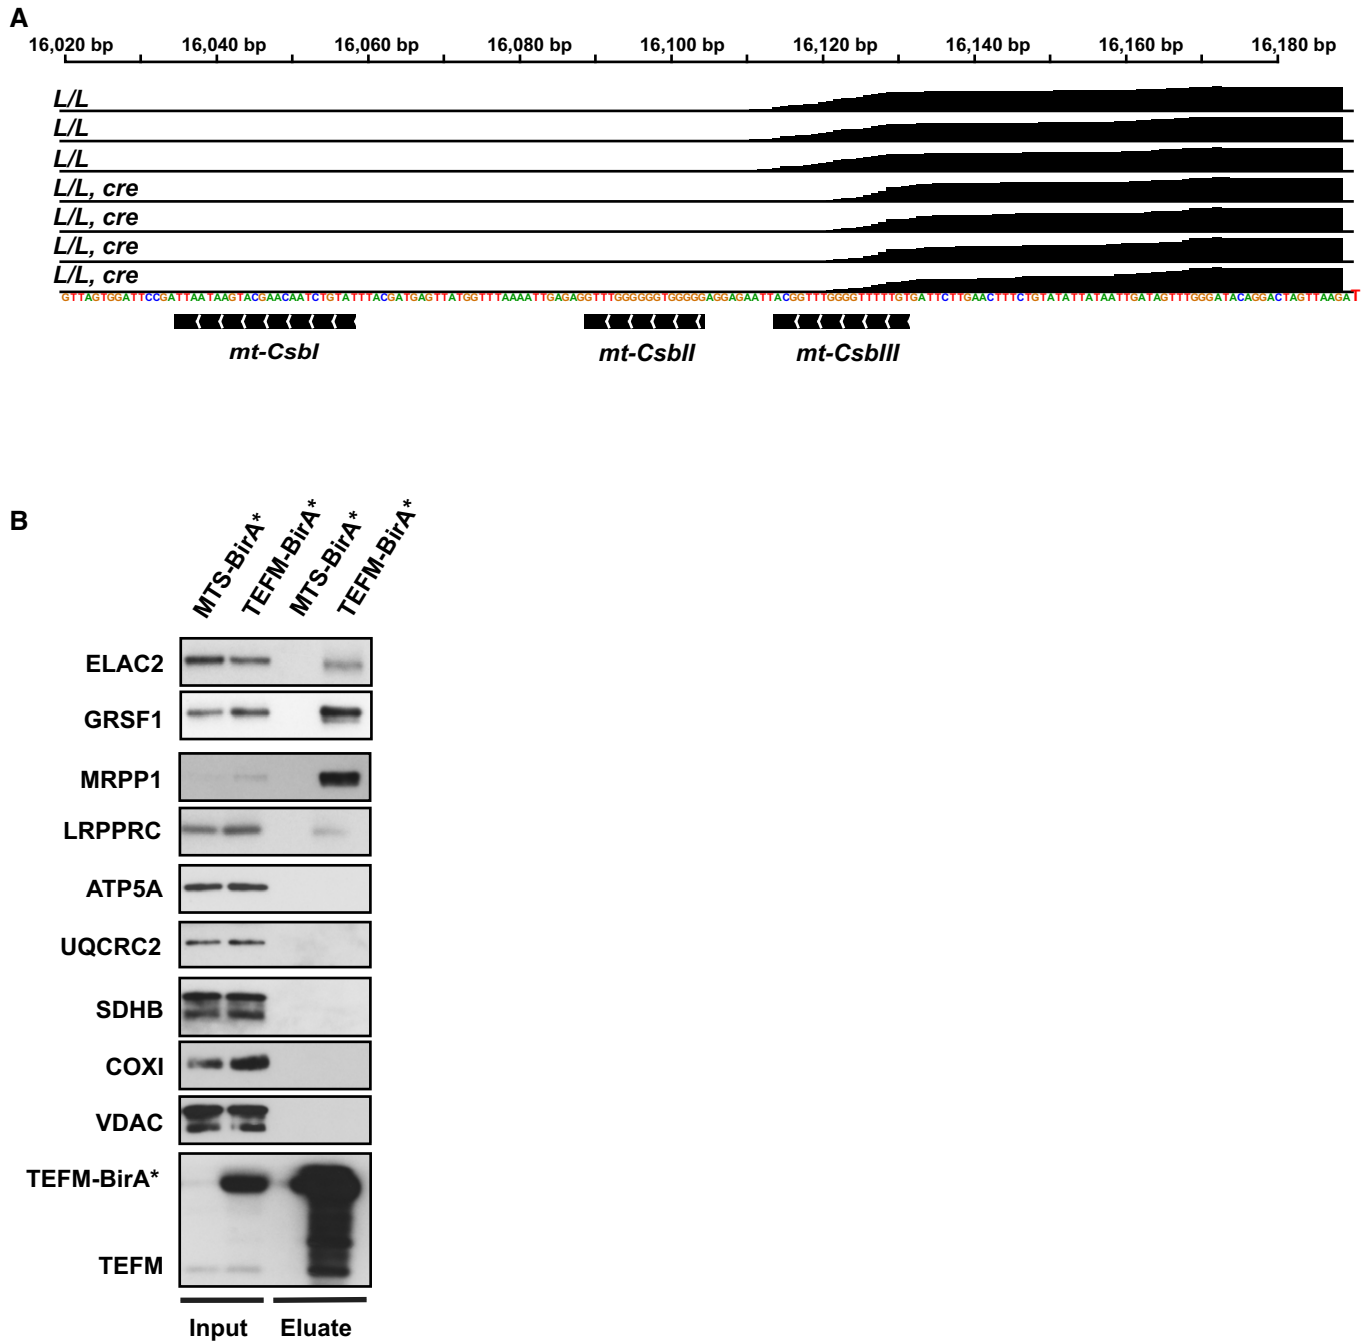

**Figure EV5. Transcriptome-wide analysis of *Tefm* knockout hearts and TEFM interacts with mtRNA processing factors.**

A Normalized read counts corresponding to the light-promoter region from small RNA sequencing of mitochondrial transcripts showing the 7S RNA read counts (*L/L*,  $n = 4$ ; *L/L, cre*,  $n = 3$ ).

B Western blot analyses of RNA processing-related proteins in isolated mitochondria (input) and eluates when TEFM-BirA\* was used as a bait. Eluate (100%), input (1%).
